# Supplementary material for: Ester derivatives of hexahomotrioxacalix[3]naphthalenes: conformational and binding properties with alkali metal cations
Source: Royal Society of Chemistry journal article supplement (doi:10.1039/b209046p), 2003-01-08
Supplement: b209046p.pdf [file b209046p.pdf]

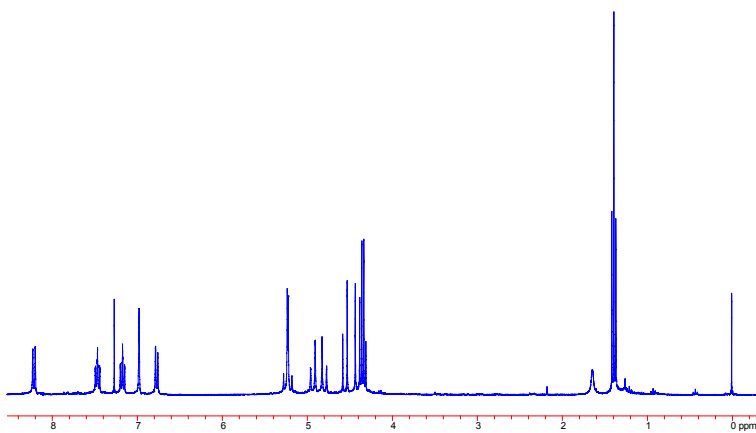

**Figure 1** <sup>1</sup>H NMR spectrum of *cone* conformer triester **9**.

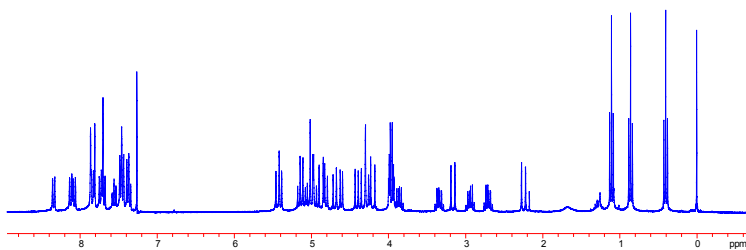

**Figure 2** <sup>1</sup>H NMR spectrum of *partial cone* conformer triester **10**.
